# Supplementary material for: Sec3 Exocyst Component Knockdown Inhibits Axonal Formation and Cortical Neuronal Migration During Brain Cortex Development
Source: Research Square preprint supplement (doi:10.21203/rs.3.rs-149990/v1), 2021-02-05

Supplementary Figure 1

Sec3 exocyst component knockdown inhibits axonal formation and cortical neuronal migration during brain cortex development

Florentyna Bustos Plonka<sup>1</sup>, Lucas J. Sosa<sup>1\*</sup> and Santiago Quiroga<sup>1\*</sup>

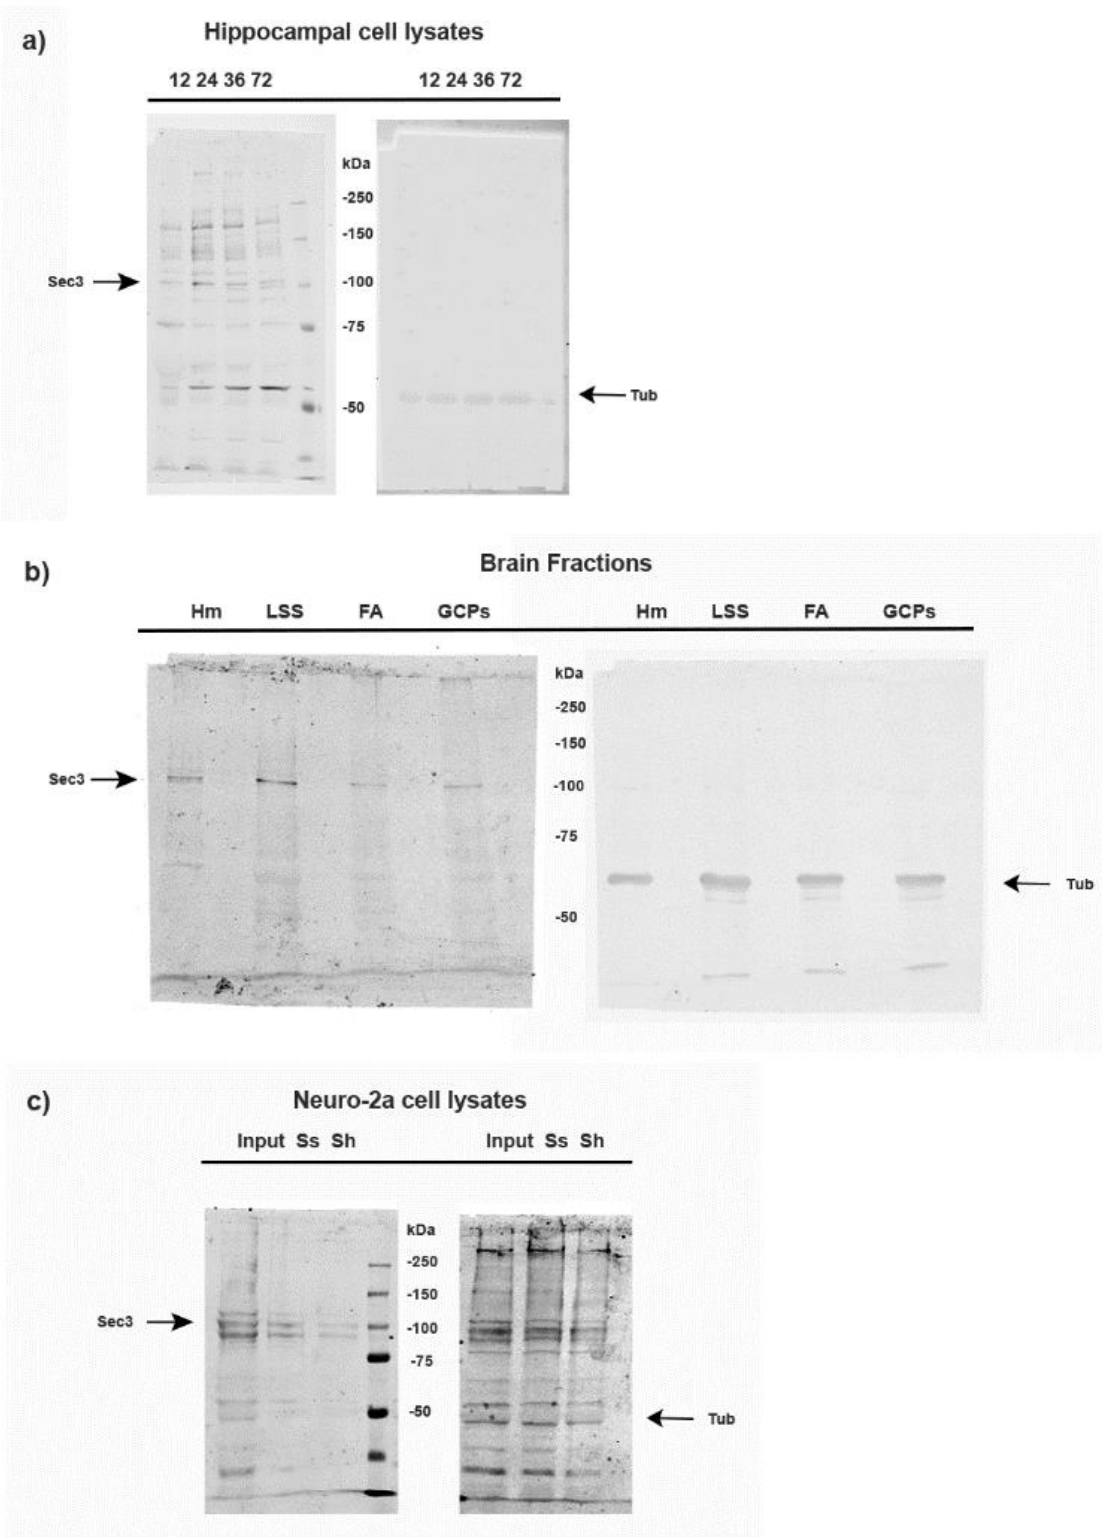

Supplement: Supplementary file 1 [file 3f6fa4dca4669efb79f7175b.pdf]
